# Supplementary material for: Longitudinal network-based brain grey matter MRI measures are clinically relevant and sensitive to treatment effects in multiple sclerosis
Source: PubMed Central journal article supplement (PMC11285187; doi:10.1093/braincomms/fcae234), 2024-07-29
Supplement: fcae234_supplementary_data.pdf [file fcae234_supplementary_data.pdf]

# Supplementary Materials

## Appendix 1

International Progressive MS Alliance (IPMSA) Investigators in this network:

| Name                 | Institution                                                                                                                                                                         |
|----------------------|-------------------------------------------------------------------------------------------------------------------------------------------------------------------------------------|
| Douglas L. Arnold    | McConnell Brain Imaging Centre, Montreal Neurological Institute, McGill University, Montreal, Quebec, Canada                                                                        |
| Sridar Narayanan     | McConnell Brain Imaging Centre, Montreal Neurological Institute, McGill University, Montreal, Quebec, Canada                                                                        |
| Frederik Barkhof     | Queen Square Multiple Sclerosis Centre, Department of Neuroinflammation, UCL Queen Square Institute of Neurology, Faculty of Brain Sciences, University College London, WC1B5EH, UK |
| Olga Ciccarelli      | Queen Square Multiple Sclerosis Centre, Department of Neuroinflammation, UCL Queen Square Institute of Neurology, Faculty of Brain Sciences, University College London, WC1B5EH, UK |
| Declan Chard         | Queen Square Multiple Sclerosis Centre, Department of Neuroinflammation, UCL Queen Square Institute of Neurology, Faculty of Brain Sciences, University College London, WC1B5EH, UK |
| Louis Collins        | McConnell Brain Imaging Centre, Montreal Neurological Institute, McGill University, Montreal, Quebec, Canada                                                                        |
| Tal Arbel            | McConnell Brain Imaging Centre, Montreal Neurological Institute, McGill University, Montreal, Quebec, Canada                                                                        |
| Charles R.G. Guttman | Center for Neurological Imaging, Brigham and Women's Hospital, Harvard Medical School, Massachusetts, USA                                                                           |
| Jerry S. Wolinsky    | McGovern Medical School, The University of Texas Health Science Center at Houston (UTHealth), Houston, Texas, USA                                                                   |
| Garry R. Cutter      | University of Alabama at Birmingham School of Public Health, USA                                                                                                                    |
| Nicola De Stefano    | University of Siena, Italy                                                                                                                                                          |
| Maria Pia Sormani    | University of Genoa, Italy                                                                                                                                                          |
| Ludwig Kappos        | University Hospital Basel, Switzerland                                                                                                                                              |
| Jack H Simon         | Oregon Health and Sciences University, Portland Veterans Affairs Medical Center, Oregon, USA                                                                                        |
| Jeremy Chataway      | Queen Square Multiple Sclerosis Centre, Department of Neuroinflammation, UCL Queen Square Institute of Neurology,                                                                   |

Faculty of Brain Sciences, University College London, WC1B5EH,  
UK

Raj Kapoor

Queen Square Multiple Sclerosis Centre, Department of  
Neuroinflammation, UCL Queen Square Institute of Neurology,  
Faculty of Brain Sciences, University College London, WC1B5EH,  
UK

Howard L. Weiner  
(CLIMB Investigator)

Brigham and Women's Hospital, Ann Romney Center for  
Neurologic Diseases, Department of Neurology, Boston, MA,  
02115

Tanuja Chitnis  
(CLIMB Investigator)

Brigham and Women's Hospital, Ann Romney Center for  
Neurologic Diseases, Department of Neurology, Boston, MA,  
02115

Rohit Bakshi (CLIMB  
Investigator)

Brigham and Women's Hospital, Ann Romney Center for  
Neurologic Diseases, Department of Neurology, Boston, MA,  
02115

**Supplementary Table 1 Details of clinical trials included in this study**

| <b>Trial</b>       | <b>ClinicalTrials.gov Identifier</b> | <b>Sample</b> | <b>MS type</b> | <b>Age Mean (SD)</b> | <b>Sex (M/ F)</b> | <b>EDSS Median (range)</b> | <b>Trial drug</b>                                          | <b>Duration of follow-up (years) mean(SD)</b> | <b>End-point achieved</b> | <b>Cohort</b> |
|--------------------|--------------------------------------|---------------|----------------|----------------------|-------------------|----------------------------|------------------------------------------------------------|-----------------------------------------------|---------------------------|---------------|
| <b>ASCEND</b>      | NCT00135226                          | 851           | SPMS           | 46.7 (7.7)           | 319/532           | 6.0 [3.0-6.5]              | Natalizumab 300 mg                                         | 12.0 (6.9)                                    | No                        | Training      |
| <b>DCE</b>         | NCT00420212                          | 1060          | RRMS           | 37.5 (9.1)           | 293/767           | 2.5 [0.0-6.0]              | Glatiramer Acetate, BG00012 240 mg TID, BG00012 240 mg BID | 4.9 (5.2)                                     | No                        | Training      |
| <b>LIPOIC-ACID</b> | NCT03161028                          | 37            | SPMS           | 58.8 (6.2)           | 14/23             | 6.0 [3.0-9.0]              | Lipoic-acid                                                | 29.3 (9.3)                                    | No                        | Training      |
| <b>MS-SMART</b>    | NCT01910259                          | 394           | SPMS           | 54.7 (7.0)           | 131/263           | 6.0 [4.0-6.5]              | Fluoxetine, Riluzole, Amiloride                            | 15.2 (9.4)                                    | No                        | Training      |
| <b>OLYMPUS</b>     | NCT00087529                          | 422           | PPMS           | 49.9 (8.9)           | 209/213           | 5.0 [2.0-7.0]              | Rituxumab                                                  | 4.0 (4.3)                                     | No                        | Training      |
| <b>OPERA1</b>      | NCT01412333                          | 800           | RRMS           | 37.0 (9.4)           | 271/529           | 2.5 [0.0-6.0]              | Interferon B-1a, Ocrelizumab                               | 3.9 (4.8)                                     | Yes                       | Application   |
| <b>OPERA2</b>      | NCT01412333                          | 824           | RRMS           | 37.3 (9.0)           | 283/541           | 2.5 [0.0-6.0]              | Interferon B-1a, Ocrelizumab                               | 4.2 (5.0)                                     | Yes                       | Application   |
| <b>ORATORIO</b>    | NCT01194570                          | 701           | PPMS           | 44.6 (8.0)           | 353/348           | 4.5 [2.5-6.5]              | Ocrelizumab                                                | 2.83 (3.1)                                    | Yes                       | Application   |

**Supplementary Table 2 Spatial cross-correlations between GM components identified from the training and application cohorts.**

| <b>Networks</b> | <b>Spatial cross-correlations</b> |
|-----------------|-----------------------------------|
| 1               | r= 0.90                           |
| 2               | r= 0.80                           |
| 3               | r= 0.92                           |
| 4               | r= 0.84                           |
| 5               | r= 0.82                           |
| 6               | r= 0.92                           |
| 7               | r= 1.00                           |
| 8               | r= 0.90                           |
| 9               | r= 0.92                           |
| 10              | r= 0.94                           |
| 11              | r= 0.97                           |
| 12              | r= 0.75                           |
| 13              | r= 0.72                           |
| 14              | r= 0.91                           |
| 15              | r= 1.00                           |
| 16              | r=1.00                            |
| 17              | r= 0.53                           |
| 18              | r= 0.94                           |
| 19              | r= 0.95                           |
| 20              | r= 0.96                           |

### Supplementary Table 3 Brain regions involved in each GM network.

| Network    | Brain regions                                                                                                                                                                                                                                                                                                                                                                                      |
|------------|----------------------------------------------------------------------------------------------------------------------------------------------------------------------------------------------------------------------------------------------------------------------------------------------------------------------------------------------------------------------------------------------------|
| Network 1  | Transverse temporal gyrus, planum temporale, postcentral gyrus                                                                                                                                                                                                                                                                                                                                     |
| Network 2  | Cerebellum, inferior, middle, and superior occipital gyrus, fusiform gyrus, cuneus, frontal pole, accumbens area, subcallosal area, planum polare, cingulate gyrus, caudate, pallidum, putamen, parahippocampal gyrus, amygdala, hippocampus                                                                                                                                                       |
| Network 3  | Postcentral gyrus, left anterior orbital gyrus, right occipital pole, left frontal pole, left gyrus rectus, right lateral orbital gyrus, accumbens area, basal forebrain, subcallosal area, occipital fusiform gyrus, parahippocampal gyrus, cerebellum, amygdala, inferior, middle, and superior temporal gyrus.                                                                                  |
| Network 4  | Medial frontal cortex, orbital, opercular, and triangular part of the inferior frontal gyrus, frontal operculum, insula, gyrus rectus, transverse temporal gyrus, claustrum, medial frontal cortex, parietal operculum, planum temporale, central and parietal operculum, planum temporale, frontal pole, parahippocampal gyrus, occipital fusiform gyrus, cuneus, calcarine cortex, lingual gyrus |
| Network 5  | Triangular part of the inferior frontal gyrus, parietal operculum, anterior and middle cingulate gyrus, medial frontal cortex, transverse temporal gyrus, frontal pole, entorhinal area, temporal pole                                                                                                                                                                                             |
| Network 6  | Precuneus, posterior cingulate gyrus, anterior and lateral orbital gyrus, pallidum, cerebellum                                                                                                                                                                                                                                                                                                     |
| Network 7  | Right cerebellum                                                                                                                                                                                                                                                                                                                                                                                   |
| Network 8  | Planum polare, superior temporal gyrus, superior parietal lobule, superior occipital gyrus, anterior insula                                                                                                                                                                                                                                                                                        |
| Network 9  | Inferior temporal gyrus, fusiform gyrus, medial orbital gyrus, occipital fusiform gyrus, cerebellum, pallidum, calcarine cortex, postcentral gyrus, forebrain, accumbens area, postcentral gyrus                                                                                                                                                                                                   |
| Network 10 | Angular gyrus, middle occipital gyrus, planum temporale, transverse temporal gyrus, triangular and opercular part of the inferior frontal gyrus, anterior insula, frontal and central operculum                                                                                                                                                                                                    |
| Network 11 | Planum polare, posterior insula, triangular part of the inferior and middle frontal gyrus, postcentral gyrus                                                                                                                                                                                                                                                                                       |
| Network 12 | Hippocampus, pallidum, amygdala, putamen, claustrum, subcallosal area, middle cingulate gyrus, cerebellum, entorhinal area, precentral gyrus, posterior orbital gyrus, basal forebrain, accumbens, planum temporale, central operculum, superior temporal gyrus, supramarginal gyrus                                                                                                               |
| Network 13 | Pons, brain stem, thalamus, planum polare, putamen, orbital part of the inferior frontal gyrus, gyrus rectus, anterior orbital gyrus                                                                                                                                                                                                                                                               |
| Network 14 | Posterior orbital gyrus, cerebellum, planum temporale and polare, triangular and opercular part of the inferior and superior frontal gyrus, transverse temporal gyrus, parietal operculum, frontal pole, medial frontal cortex, precentral gyrus, anterior and middle cingulate gyrus, supplementary motor cortex                                                                                  |
| Network 15 | Left cerebellum                                                                                                                                                                                                                                                                                                                                                                                    |
| Network 16 | Right superior frontal gyrus                                                                                                                                                                                                                                                                                                                                                                       |

- Network 17 Caudate, thalamus, lateral orbital gyrus, frontal pole, anterior insula, putamen, parahippocampal gyrus, posterior cingulate gyrus, entorhinal area, brain stem
- Network 18 Right middle frontal gyrus
- Network 19 Inferior, middle, and superior temporal gyrus, lateral and medial orbital gyrus, occipital pole
- Network 20 Precentral gyrus, lateral and medial orbital gyrus, gyrus rectus, medial frontal cortex

**Supplementary Table 4 Group comparison of GM networks among MS phenotypes and overtime in the training cohort using network-based measures obtained using Lasso.**

| <b>Network 1</b>                       |                        |              |          |
|----------------------------------------|------------------------|--------------|----------|
| <b>Group comparison</b>                | <b>Cross-sectional</b> |              |          |
|                                        | $\beta$                | <i>CI</i>    | <i>p</i> |
| <b>SPMS vs. RRMS</b>                   | -0.006                 | -0.021:0.009 | 0.42     |
| <b>SPMS vs. PPMS</b>                   | -0.005                 | -0.021:0.011 | 0.53     |
| <b>RRMS vs. PPMS</b>                   | 0.001                  | -0.016:0.018 | 0.91     |
| <b>Group comparison</b>                | <b>Longitudinal</b>    |              |          |
|                                        | $\beta$                | <i>CI</i>    | <i>p</i> |
| <b>Rate of change in SPMS vs. RRMS</b> | 0.0001                 | -0.001:0.001 | 0.99     |
| <b>Rate of change in SPMS vs. PPMS</b> | 0.0001                 | -0.003:0.003 | 0.82     |
| <b>Rate of change in RRMS vs. PPMS</b> | 0.0001                 | -0.002:0.003 | 0.81     |
| <b>Network 2</b>                       |                        |              |          |
| <b>Group comparison</b>                | <b>Cross-sectional</b> |              |          |
|                                        | $\beta$                | <i>CI</i>    | <i>p</i> |
| <b>SPMS vs. RRMS</b>                   | -0.013                 | -0.054:0.028 | 0.53     |
| <b>SPMS vs. PPMS</b>                   | -0.021                 | -0.065:0.023 | 0.35     |
| <b>RRMS vs. PPMS</b>                   | -0.008                 | -0.056:0.04  | 0.75     |
| <b>Group comparison</b>                | <b>Longitudinal</b>    |              |          |
|                                        | $\beta$                | <i>CI</i>    | <i>p</i> |
| <b>Rate of change in SPMS vs. RRMS</b> | 0.006                  | 0.001:0.011  | <0.05    |
| <b>Rate of change in SPMS vs. PPMS</b> | -0.002                 | -0.012:0.007 | 0.63     |
| <b>Rate of change in RRMS vs. PPMS</b> | -0.008                 | -0.017:0.001 | 0.07     |
| <b>Network 3</b>                       |                        |              |          |
| <b>Group comparison</b>                | <b>Cross-sectional</b> |              |          |
|                                        | $\beta$                | <i>CI</i>    | <i>p</i> |
| <b>SPMS vs. RRMS</b>                   | -0.006                 | -0.016:0.004 | 0.24     |
| <b>SPMS vs. PPMS</b>                   | -0.005                 | -0.016:0.006 | 0.38     |
| <b>RRMS vs. PPMS</b>                   | 0.001                  | -0.011:0.013 | 0.84     |

| Group comparison                | Longitudinal    |               |          |
|---------------------------------|-----------------|---------------|----------|
|                                 | $\beta$         | CI            | <i>p</i> |
| Rate of change in SPMS vs. RRMS | 0.003           | 0.002:0.005   | <0.0001* |
| Rate of change in SPMS vs. PPMS | 0.001           | -0.002:0.003  | 0.58     |
| Rate of change in RRMS vs. PPMS | -0.003          | -0.005:0      | <0.05    |
| <b>Network 4</b>                |                 |               |          |
| Group comparison                | Cross-sectional |               |          |
|                                 | $\beta$         | CI            | <i>p</i> |
| SPMS vs. RRMS                   | 0.002           | -0.023:0.027  | 0.87     |
| SPMS vs. PPMS                   | 0.01            | -0.017:0.037  | 0.46     |
| RRMS vs. PPMS                   | 0.008           | -0.021:0.037  | 0.59     |
| Group comparison                | Longitudinal    |               |          |
|                                 | $\beta$         | CI            | <i>p</i> |
| Rate of change in SPMS vs. RRMS | 0.0001          | -0.002:0.003  | 0.89     |
| Rate of change in SPMS vs. PPMS | -0.014          | -0.019:-0.009 | <0.0001* |
| Rate of change in RRMS vs. PPMS | -0.014          | -0.019:-0.009 | <0.0001* |
| <b>Network 5</b>                |                 |               |          |
| Group comparison                | Cross-sectional |               |          |
|                                 | $\beta$         | CI            | <i>p</i> |
| SPMS vs. RRMS                   | 0.075           | 0.02:0.13     | <0.01*   |
| SPMS vs. PPMS                   | -0.032          | -0.091:0.027  | 0.29     |
| RRMS vs. PPMS                   | -0.107          | -0.172:-0.042 | <0.005*  |
| Group comparison                | Longitudinal    |               |          |
|                                 | $\beta$         | CI            | <i>p</i> |
| Rate of change in SPMS vs. RRMS | 0.0001          | -0.009:0.009  | 0.054    |
| Rate of change in SPMS vs. PPMS | -0.005          | -0.013:0.004  | 0.96     |
| Rate of change in RRMS vs. PPMS | -0.004          | -0.012:0.004  | 0.29     |
| <b>Network 6</b>                |                 |               |          |
| Group comparison                | Cross-sectional |               |          |
|                                 | $\beta$         | CI            | <i>p</i> |



|                                        |                        |                   |          |
|----------------------------------------|------------------------|-------------------|----------|
| <b>SPMS vs. RRMS</b>                   | -0.009                 | -0.026:0.009      | 0.33     |
| <b>SPMS vs. PPMS</b>                   | -0.013                 | -0.032:0.006      | 0.18     |
| <b>RRMS vs. PPMS</b>                   | -0.004                 | -0.025:0.016      | 0.70     |
| <b>Group comparison</b>                | <b>Longitudinal</b>    |                   |          |
|                                        | $\beta$                | <i>CI</i>         | <i>p</i> |
| <b>Rate of change in SPMS vs. RRMS</b> | -0.002                 | -0.003:0.001      | <0.05    |
| <b>Rate of change in SPMS vs. PPMS</b> | -0.003                 | -0.006:0.001      | <0.05    |
| <b>Rate of change in RRMS vs. PPMS</b> | -0.001                 | -0.004:0.001      | 0.32     |
| <b>Network 7</b>                       |                        |                   |          |
| <b>Group comparison</b>                | <b>Cross-sectional</b> |                   |          |
|                                        | $\beta$                | <i>CI</i>         | <i>p</i> |
| <b>SPMS vs. RRMS</b>                   | -0.02                  | -0.031:-<br>0.008 | <0.005*  |
| <b>SPMS vs. PPMS</b>                   | -0.011                 | -0.024:0.002      | 0.10     |
| <b>RRMS vs. PPMS</b>                   | 0.009                  | -0.005:0.023      | 0.22     |
| <b>Group comparison</b>                | <b>Longitudinal</b>    |                   |          |
|                                        | $\beta$                | <i>CI</i>         | <i>P</i> |
| <b>Rate of change in SPMS vs. RRMS</b> | 0.002                  | 0:0.004           | <0.05    |
| <b>Rate of change in SPMS vs. PPMS</b> | 0.004                  | 0.001:0.008       | <0.01*   |
| <b>Rate of change in RRMS vs. PPMS</b> | 0.003                  | -0.001:0.006      | 0.10     |
| <b>Network 8</b>                       |                        |                   |          |
| <b>Group comparison</b>                | <b>Cross-sectional</b> |                   |          |
|                                        | $\beta$                | <i>CI</i>         | <i>p</i> |
| <b>SPMS vs. RRMS</b>                   | 0.009                  | -0.016:0.033      | 0.48     |
| <b>SPMS vs. PPMS</b>                   | -0.021                 | -0.047:0.005      | 0.12     |
| <b>RRMS vs. PPMS</b>                   | -0.029                 | -0.058:-<br>0.001 | <0.05    |
| <b>Group comparison</b>                | <b>Longitudinal</b>    |                   |          |
|                                        | $\beta$                | <i>CI</i>         | <i>p</i> |
| <b>Rate of change in SPMS vs. RRMS</b> | -0.002                 | -0.004:0          | 0.12     |
| <b>Rate of change in SPMS vs. PPMS</b> | 0.008                  | 0.003:0.013       | <0.001*  |
| <b>Rate of change in RRMS vs. PPMS</b> | 0.01                   | 0.006:0.014       | <0.0001* |

| <b>Network 9</b>                       |                        |               |          |
|----------------------------------------|------------------------|---------------|----------|
| <b>Group comparison</b>                | <b>Cross-sectional</b> |               |          |
|                                        | $\beta$                | <i>CI</i>     | <i>p</i> |
| <b>SPMS vs. RRMS</b>                   | 0.005                  | -0.004:0.014  | 0.25     |
| <b>SPMS vs. PPMS</b>                   | 0.002                  | -0.007:0.012  | 0.65     |
| <b>RRMS vs. PPMS</b>                   | -0.003                 | -0.013:0.007  | 0.58     |
| <b>Group comparison</b>                | <b>Longitudinal</b>    |               |          |
|                                        | $\beta$                | <i>CI</i>     | <i>p</i> |
| <b>Rate of change in SPMS vs. RRMS</b> | 0.001                  | -0.001:0.001  | 0.89     |
| <b>Rate of change in SPMS vs. PPMS</b> | -0.003                 | -0.006:-0.001 | <0.01*   |
| <b>Rate of change in RRMS vs. PPMS</b> | -0.003                 | -0.006:-0.001 | <0.005*  |
| <b>Network 10</b>                      |                        |               |          |
| <b>Group comparison</b>                | <b>Cross-sectional</b> |               |          |
|                                        | $\beta$                | <i>CI</i>     | <i>p</i> |
| <b>SPMS vs. RRMS</b>                   | 0.003                  | -0.019:0.026  | 0.77     |
| <b>SPMS vs. PPMS</b>                   | 0.001                  | -0.024:0.025  | 0.96     |
| <b>RRMS vs. PPMS</b>                   | -0.003                 | -0.029:0.024  | 0.84     |
| <b>Group comparison</b>                | <b>Longitudinal</b>    |               |          |
|                                        | $\beta$                | <i>CI</i>     | <i>p</i> |
| <b>Rate of change in SPMS vs. RRMS</b> | -0.002                 | -0.005:0      | <0.05    |
| <b>Rate of change in SPMS vs. PPMS</b> | -0.002                 | -0.006:0.003  | 0.43     |
| <b>Rate of change in RRMS vs. PPMS</b> | 0.001                  | -0.003:0.005  | 0.76     |
| <b>Network 11</b>                      |                        |               |          |
| <b>Group comparison</b>                | <b>Cross-sectional</b> |               |          |
|                                        | $\beta$                | <i>CI</i>     | <i>p</i> |
| <b>SPMS vs. RRMS</b>                   | -0.018                 | -0.03:-0.006  | <0.005*  |
| <b>SPMS vs. PPMS</b>                   | -0.001                 | -0.015:0.012  | 0.85     |
| <b>RRMS vs. PPMS</b>                   | 0.017                  | 0.002:0.031   | <0.05    |
| <b>Group comparison</b>                | <b>Longitudinal</b>    |               |          |
|                                        | $\beta$                | <i>CI</i>     | <i>p</i> |
| <b>Rate of change in SPMS vs. RRMS</b> | 0.001                  | -0.001:0.002  | 0.39     |

|                                        |                        |                   |          |
|----------------------------------------|------------------------|-------------------|----------|
| <b>Rate of change in SPMS vs. PPMS</b> | -0.002                 | -0.005:0.001      | 0.26     |
| <b>Rate of change in RRMS vs. PPMS</b> | -0.002                 | -0.005:0          | 0.08     |
| <b>Network 12</b>                      |                        |                   |          |
| <b>Group comparison</b>                | <b>Cross-sectional</b> |                   |          |
|                                        | $\beta$                | $CI$              | $p$      |
| <b>SPMS vs. RRMS</b>                   | -0.032                 | -0.051:-<br>0.013 | <0.005*  |
| <b>SPMS vs. PPMS</b>                   | -0.004                 | -0.025:0.016      | 0.69     |
| <b>RRMS vs. PPMS</b>                   | 0.027                  | 0.005:0.05        | <0.05    |
| <b>Group comparison</b>                | <b>Longitudinal</b>    |                   |          |
|                                        | $\beta$                | $CI$              | $p$      |
| <b>Rate of change in SPMS vs. RRMS</b> | 0.005                  | 0.003:0.007       | <0.0001* |
| <b>Rate of change in SPMS vs. PPMS</b> | 0.004                  | 0:0.008           | 0.065    |
| <b>Rate of change in RRMS vs. PPMS</b> | -0.001                 | -0.005:0.003      | 0.67     |
| <b>Network 13</b>                      |                        |                   |          |
| <b>Group comparison</b>                | <b>Cross-sectional</b> |                   |          |
|                                        | $\beta$                | $CI$              | $p$      |
| <b>SPMS vs. RRMS</b>                   | -0.007                 | -0.027:0.013      | 0.48     |
| <b>SPMS vs. PPMS</b>                   | -0.042                 | -0.064:-<br>0.021 | <0.0005* |
| <b>RRMS vs. PPMS</b>                   | -0.035                 | -0.059:-<br>0.012 | <0.005*  |
| <b>Group comparison</b>                | <b>Longitudinal</b>    |                   |          |
|                                        | $\beta$                | $CI$              | $p$      |
| <b>Rate of change in SPMS vs. RRMS</b> | 0.003                  | 0.001:0.005       | <0.005*  |
| <b>Rate of change in SPMS vs. PPMS</b> | 0.005                  | 0.001:0.009       | <0.05*   |
| <b>Rate of change in RRMS vs. PPMS</b> | 0.001                  | -0.002:0.005      | 0.43     |
| <b>Network 14</b>                      |                        |                   |          |
| <b>Group comparison</b>                | <b>Cross-sectional</b> |                   |          |
|                                        | $\beta$                | $CI$              | $p$      |
| <b>SPMS vs. RRMS</b>                   | 0.002                  | -0.027:0.031      | 0.90     |
| <b>SPMS vs. PPMS</b>                   | 0.002                  | -0.029:0.034      | 0.90     |

|                                        |                        |                   |          |
|----------------------------------------|------------------------|-------------------|----------|
| <b>RRMS vs. PPMS</b>                   | 0.0001                 | -0.034:0.035      | 0.99     |
| <b>Group comparison</b>                | <b>Longitudinal</b>    |                   |          |
|                                        | $\beta$                | <i>CI</i>         | <i>p</i> |
| <b>Rate of change in SPMS vs. RRMS</b> | -0.005                 | -0.008:-<br>0.002 | <0.005*  |
| <b>Rate of change in SPMS vs. PPMS</b> | -0.007                 | -0.013:0          | <0.05    |
| <b>Rate of change in RRMS vs. PPMS</b> | -0.001                 | -0.007:0.004      | 0.62     |
| <b>Network 15</b>                      |                        |                   |          |
| <b>Group comparison</b>                | <b>Cross-sectional</b> |                   |          |
|                                        | $\beta$                | <i>CI</i>         | <i>p</i> |
| <b>SPMS vs. RRMS</b>                   | -0.02                  | -0.032:-<br>0.008 | <0.001*  |
| <b>SPMS vs. PPMS</b>                   | -0.01                  | -0.023:0.003      | 0.12     |
| <b>RRMS vs. PPMS</b>                   | 0.01                   | -0.004:0.024      | 0.16     |
| <b>Group comparison</b>                | <b>Longitudinal</b>    |                   |          |
|                                        | $\beta$                | <i>CI</i>         | <i>p</i> |
| <b>Rate of change in SPMS vs. RRMS</b> | 0.001                  | 0:0.003           | 0.07     |
| <b>Rate of change in SPMS vs. PPMS</b> | 0.005                  | 0.003:0.008       | <0.0005* |
| <b>Rate of change in RRMS vs. PPMS</b> | 0.004                  | 0.001:0.006       | <0.005*  |
| <b>Network 16</b>                      |                        |                   |          |
| <b>Group comparison</b>                | <b>Cross-sectional</b> |                   |          |
|                                        | $\beta$                | <i>CI</i>         | <i>p</i> |
| <b>SPMS vs. RRMS</b>                   | -0.006                 | -0.018:0.007      | 0.38     |
| <b>SPMS vs. PPMS</b>                   | -0.004                 | -0.017:0.01       | 0.59     |
| <b>RRMS vs. PPMS</b>                   | 0.002                  | -0.013:0.017      | 0.80     |
| <b>Group comparison</b>                | <b>Longitudinal</b>    |                   |          |
|                                        | $\beta$                | <i>CI</i>         | <i>p</i> |
| <b>Rate of change in SPMS vs. RRMS</b> | 0.0001                 | -0.001:0.002      | 0.80     |
| <b>Rate of change in SPMS vs. PPMS</b> | 0.001                  | -0.002:0.004      | 0.48     |
| <b>Rate of change in RRMS vs. PPMS</b> | 0.001                  | -0.002:0.004      | 0.53     |
| <b>Network 17</b>                      |                        |                   |          |

| <b>Group comparison</b>                | <b>Cross-sectional</b> |                   |          |
|----------------------------------------|------------------------|-------------------|----------|
|                                        | $\beta$                | <i>CI</i>         | <i>p</i> |
| <b>SPMS vs. RRMS</b>                   | -0.01                  | -0.031:0.012      | 0.38     |
| <b>SPMS vs. PPMS</b>                   | -0.055                 | -0.078:-<br>0.032 | <0.0001* |
| <b>RRMS vs. PPMS</b>                   | -0.046                 | -0.071:-<br>0.021 | <0.0005* |
| <b>Group comparison</b>                | <b>Longitudinal</b>    |                   |          |
|                                        | $\beta$                | <i>CI</i>         | <i>p</i> |
| <b>Rate of change in SPMS vs. RRMS</b> | 0.008                  | 0.005:0.011       | <0.0001* |
| <b>Rate of change in SPMS vs. PPMS</b> | 0.034                  | 0.028:0.04        | <0.0001* |
| <b>Rate of change in RRMS vs. PPMS</b> | 0.025                  | 0.02:0.031        | <0.0001* |
| <b>Network 18</b>                      |                        |                   |          |
| <b>Group comparison</b>                | <b>Cross-sectional</b> |                   |          |
|                                        | $\beta$                | <i>CI</i>         | <i>p</i> |
| <b>SPMS vs. RRMS</b>                   | -0.012                 | -0.025:0.001      | 0.07     |
| <b>SPMS vs. PPMS</b>                   | -0.001                 | -0.015:0.013      | 0.89     |
| <b>RRMS vs. PPMS</b>                   | 0.011                  | -0.004:0.026      | 0.16     |
| <b>Group comparison</b>                | <b>Longitudinal</b>    |                   |          |
|                                        | $\beta$                | <i>CI</i>         | <i>p</i> |
| <b>Rate of change in SPMS vs. RRMS</b> | -0.001                 | -0.002:0.001      | 0.24     |
| <b>Rate of change in SPMS vs. PPMS</b> | 0.0001                 | -0.003:0.003      | 0.96     |
| <b>Rate of change in RRMS vs. PPMS</b> | 0.001                  | -0.002:0.003      | 0.54     |
| <b>Network 19</b>                      |                        |                   |          |
| <b>Group comparison</b>                | <b>Cross-sectional</b> |                   |          |
|                                        | $\beta$                | <i>CI</i>         | <i>p</i> |
| <b>SPMS vs. RRMS</b>                   | -0.005                 | -0.017:0.00       | 0.49     |
| <b>SPMS vs. PPMS</b>                   | -0.002                 | -0.016:0.012      | 0.75     |
| <b>RRMS vs. PPMS</b>                   | 0.002                  | -0.013:0.017      | 0.77     |
| <b>Group comparison</b>                | <b>Longitudinal</b>    |                   |          |
|                                        | $\beta$                | <i>CI</i>         | <i>p</i> |
| <b>Rate of change in SPMS vs. RRMS</b> | -0.001                 | -0.003:0          | 0.052    |

|                                        |                        |                   |          |
|----------------------------------------|------------------------|-------------------|----------|
| <b>Rate of change in SPMS vs. PPMS</b> | -0.004                 | -0.007:-<br>0.002 | <0.005*  |
| <b>Rate of change in RRMS vs. PPMS</b> | -0.003                 | -0.005:-<br>0.001 | <0.05*   |
| <b>Network 20</b>                      |                        |                   |          |
| <b>Group comparison</b>                | <b>Cross-sectional</b> |                   |          |
|                                        | $\beta$                | $CI$              | $p$      |
| <b>SPMS vs. RRMS</b>                   | -0.012                 | -0.028:0.004      | 0.16     |
| <b>SPMS vs. PPMS</b>                   | -0.018                 | -0.036:-<br>0.001 | <0.05    |
| <b>RRMS vs. PPMS</b>                   | -0.007                 | -0.026:0.012      | 0.48     |
| <b>Group comparison</b>                | <b>Longitudinal</b>    |                   |          |
|                                        | $\beta$                | $CI$              | $p$      |
| <b>Rate of change in SPMS vs. RRMS</b> | 0.001                  | -0.001:0.002      | 0.49     |
| <b>Rate of change in SPMS vs. PPMS</b> | 0.0001                 | -0.003:0.004      | 0.80     |
| <b>Rate of change in RRMS vs. PPMS</b> | 0.0001                 | -0.003:0.003      | 0.90     |
| <b>Whole brain grey matter volume</b>  |                        |                   |          |
| <b>Group comparison</b>                | <b>Cross-sectional</b> |                   |          |
|                                        | $\beta$                | $CI$              | $p$      |
| <b>SPMS vs. RRMS</b>                   | -0.012                 | -0.017:-<br>0.006 | <0.0001* |
| <b>SPMS vs. PPMS</b>                   | -0.003                 | -0.009:0.002      | 0.23     |
| <b>RRMS vs. PPMS</b>                   | 0.008                  | 0.002:0.014       | <0.01*   |
| <b>Group comparison</b>                | <b>Longitudinal</b>    |                   |          |
|                                        | $\beta$                | $CI$              | $p$      |
| <b>Rate of change in SPMS vs. RRMS</b> | 0.0001                 | -0.001:0.001      | 0.52     |
| <b>Rate of change in SPMS vs. PPMS</b> | -0.001                 | -0.003:0          | 0.13     |
| <b>Rate of change in RRMS vs. PPMS</b> | -0.002                 | -0.003:0          | <0.05    |

\*Statistically significant after False Discovery Rate correction

**Abbreviations:**  $\beta$  = Beta Estimates; SPMS = Secondary Progressive Multiple Sclerosis; PPMS = Primary Progressive Multiple Sclerosis; RRMS = Relapsing Remitting Multiple Sclerosis; SE = Standard Error

**Supplementary Table 5 Group comparison of GM networks among MS phenotypes and overtime in the training cohort using network-based measures obtained using ICA.**

| <b>Network 1</b>                       |                        |              |          |
|----------------------------------------|------------------------|--------------|----------|
| <b>Group comparison</b>                | <b>Cross-sectional</b> |              |          |
|                                        | $\beta$                | <i>CI</i>    | <i>p</i> |
| <b>SPMS vs. RRMS</b>                   | -0.006                 | -0.021:0.009 | 0.42     |
| <b>SPMS vs. PPMS</b>                   | -0.005                 | -0.021:0.011 | 0.53     |
| <b>RRMS vs. PPMS</b>                   | 0.001                  | -0.016:0.018 | 0.91     |
| <b>Group comparison</b>                | <b>Longitudinal</b>    |              |          |
|                                        | $\beta$                | <i>CI</i>    | <i>p</i> |
| <b>Rate of change in SPMS vs. RRMS</b> | 0.001                  | -0.001:0.001 | 0.99     |
| <b>Rate of change in SPMS vs. PPMS</b> | 0.001                  | -0.003:0.003 | 0.83     |
| <b>Rate of change in RRMS vs. PPMS</b> | 0.0001                 | -0.002:0.003 | 0.82     |
| <b>Network 2</b>                       |                        |              |          |
| <b>Group comparison</b>                | <b>Cross-sectional</b> |              |          |
|                                        | $\beta$                | <i>CI</i>    | <i>p</i> |
| <b>SPMS vs. RRMS</b>                   | -0.014                 | -0.054:0.027 | 0.52     |
| <b>SPMS vs. PPMS</b>                   | -0.021                 | -0.065:0.022 | 0.34     |
| <b>RRMS vs. PPMS</b>                   | -0.008                 | -0.056:0.04  | 0.75     |
| <b>Group comparison</b>                | <b>Longitudinal</b>    |              |          |
|                                        | $\beta$                | <i>CI</i>    | <i>p</i> |
| <b>Rate of change in SPMS vs. RRMS</b> | 0.006                  | 0.001:0.011  | <0.05    |
| <b>Rate of change in SPMS vs. PPMS</b> | -0.002                 | -0.012:0.008 | 0.70     |
| <b>Rate of change in RRMS vs. PPMS</b> | -0.008                 | -0.017:0.001 | 0.08     |
| <b>Network 3</b>                       |                        |              |          |
| <b>Group comparison</b>                | <b>Cross-sectional</b> |              |          |
|                                        | $\beta$                | <i>CI</i>    | <i>p</i> |
| <b>SPMS vs. RRMS</b>                   | -0.006                 | -0.016:0.004 | 0.23     |
| <b>SPMS vs. PPMS</b>                   | -0.005                 | -0.016:0.006 | 0.38     |
| <b>RRMS vs. PPMS</b>                   | 0.001                  | -0.01:0.013  | 0.83     |

| Group comparison                | Longitudinal    |               |          |
|---------------------------------|-----------------|---------------|----------|
|                                 | $\beta$         | CI            | <i>p</i> |
| Rate of change in SPMS vs. RRMS | 0.003           | 0.002:0.005   | <0.0001* |
| Rate of change in SPMS vs. PPMS | 0.001           | -0.002:0.003  | 0.58     |
| Rate of change in RRMS vs. PPMS | -0.003          | -0.005:0      | <0.05    |
| <b>Network 4</b>                |                 |               |          |
| Group comparison                | Cross-sectional |               |          |
|                                 | $\beta$         | CI            | <i>p</i> |
| SPMS vs. RRMS                   | 0.002           | -0.023:0.027  | 0.87     |
| SPMS vs. PPMS                   | 0.01            | -0.017:0.037  | 0.46     |
| RRMS vs. PPMS                   | 0.008           | -0.021:0.037  | 0.59     |
| Group comparison                | Longitudinal    |               |          |
|                                 | $\beta$         | CI            | <i>p</i> |
| Rate of change in SPMS vs. RRMS | 0.0001          | -0.002:0.003  | 0.90     |
| Rate of change in SPMS vs. PPMS | -0.014          | -0.019:-0.009 | <0.0001* |
| Rate of change in RRMS vs. PPMS | -0.014          | -0.019:-0.009 | <0.0001* |
| <b>Network 5</b>                |                 |               |          |
| Group comparison                | Cross-sectional |               |          |
|                                 | $\beta$         | CI            | <i>p</i> |
| SPMS vs. RRMS                   | 0.075           | 0.02:0.13     | <0.005*  |
| SPMS vs. PPMS                   | -0.031          | -0.091:0.028  | 0.30     |
| RRMS vs. PPMS                   | -0.107          | -0.171:-0.042 | <0.005*  |
| Group comparison                | Longitudinal    |               |          |
|                                 | $\beta$         | CI            | <i>p</i> |
| Rate of change in SPMS vs. RRMS | 0.005           | 0:0.009       | <0.053   |
| Rate of change in SPMS vs. PPMS | -0.001          | -0.01:0.008   | 0.87     |
| Rate of change in RRMS vs. PPMS | -0.005          | -0.014:0.003  | 0.20     |
| <b>Network 6</b>                |                 |               |          |
| Group comparison                | Cross-sectional |               |          |
|                                 | $\beta$         | CI            | <i>p</i> |



|                                        |                        |                   |          |
|----------------------------------------|------------------------|-------------------|----------|
| <b>SPMS vs. RRMS</b>                   | -0.009                 | -0.026:0.009      | 0.32     |
| <b>SPMS vs. PPMS</b>                   | -0.013                 | -0.032:0.006      | 0.18     |
| <b>RRMS vs. PPMS</b>                   | -0.004                 | -0.025:0.016      | 0.32     |
| <b>Group comparison</b>                | <b>Longitudinal</b>    |                   |          |
|                                        | $\beta$                | <i>CI</i>         | <i>p</i> |
| <b>Rate of change in SPMS vs. RRMS</b> | -0.002                 | -0.003:0          | <0.05    |
| <b>Rate of change in SPMS vs. PPMS</b> | -0.003                 | -0.006:0          | <0.05    |
| <b>Rate of change in RRMS vs. PPMS</b> | -0.001                 | -0.004:0.001      | 0.33     |
| <b>Network 7</b>                       |                        |                   |          |
| <b>Group comparison</b>                | <b>Cross-sectional</b> |                   |          |
|                                        | $\beta$                | <i>CI</i>         | <i>p</i> |
| <b>SPMS vs. RRMS</b>                   | -0.02                  | -0.031:-<br>0.008 | <0.005*  |
| <b>SPMS vs. PPMS</b>                   | -0.011                 | -0.024:0.002      | 0.10     |
| <b>RRMS vs. PPMS</b>                   | 0.009                  | -0.005:0.023      | 0.22     |
| <b>Group comparison</b>                | <b>Longitudinal</b>    |                   |          |
|                                        | $\beta$                | <i>CI</i>         | <i>p</i> |
| <b>Rate of change in SPMS vs. RRMS</b> | 0.002                  | 0:0.004           | <0.05    |
| <b>Rate of change in SPMS vs. PPMS</b> | 0.005                  | 0.001:0.008       | <0.01*   |
| <b>Rate of change in RRMS vs. PPMS</b> | 0.003                  | 0:0.006           | 0.09     |
| <b>Network 8</b>                       |                        |                   |          |
| <b>Group comparison</b>                | <b>Cross-sectiona</b>  |                   |          |
|                                        | $\beta$                | <i>CI</i>         | <i>p</i> |
| <b>SPMS vs. RRMS</b>                   | 0.009                  | -0.016:0.033      | 0.48     |
| <b>SPMS vs. PPMS</b>                   | -0.021                 | -0.047:0.005      | 0.12     |
| <b>RRMS vs. PPMS</b>                   | -0.029                 | -0.058:-<br>0.001 | <0.05    |
| <b>Group comparison</b>                | <b>Longitudinal</b>    |                   |          |
|                                        | $\beta$                | <i>CI</i>         | <i>p</i> |
| <b>Rate of change in SPMS vs. RRMS</b> | -0.002                 | -0.004:0          | 0.12     |
| <b>Rate of change in SPMS vs. PPMS</b> | 0.008                  | 0.003:0.013       | <0.0001* |
| <b>Rate of change in RRMS vs. PPMS</b> | 0.01                   | 0.006:0.014       | <0.0001* |

| <b>Network 9</b>                       |                        |                   |          |
|----------------------------------------|------------------------|-------------------|----------|
| <b>Group comparison</b>                | <b>Cross-sectional</b> |                   |          |
|                                        | $\beta$                | <i>CI</i>         | <i>p</i> |
| <b>SPMS vs. RRMS</b>                   | 0.005                  | -0.004:0.014      | 0.26     |
| <b>SPMS vs. PPMS</b>                   | 0.002                  | -0.007:0.012      | 0.65     |
| <b>RRMS vs. PPMS</b>                   | -0.003                 | -0.013:0.007      | 0.59     |
| <b>Group comparison</b>                | <b>Longitudinal</b>    |                   |          |
|                                        | $\beta$                | <i>CI</i>         | <i>p</i> |
| <b>Rate of change in SPMS vs. RRMS</b> | 0.0001                 | -0.001:0.001      | 0.90     |
| <b>Rate of change in SPMS vs. PPMS</b> | -0.003                 | -0.006:-<br>0.001 | <0.05*   |
| <b>Rate of change in RRMS vs. PPMS</b> | -0.003                 | -0.006:-<br>0.001 | <0.01*   |
| <b>Network 10</b>                      |                        |                   |          |
| <b>Group comparison</b>                | <b>Cross-sectional</b> |                   |          |
|                                        | $\beta$                | <i>CI</i>         | <i>p</i> |
| <b>SPMS vs. RRMS</b>                   | 0.003                  | -0.019:0.026      | 0.78     |
| <b>SPMS vs. PPMS</b>                   | 0.0001                 | -0.024:0.025      | 0.97     |
| <b>RRMS vs. PPMS</b>                   | -0.003                 | -0.029:0.024      | 0.84     |
| <b>Group comparison</b>                | <b>Longitudinal</b>    |                   |          |
|                                        | $\beta$                | <i>CI</i>         | <i>p</i> |
| <b>Rate of change in SPMS vs. RRMS</b> | -0.002                 | -0.005:0          | <0.05    |
| <b>Rate of change in SPMS vs. PPMS</b> | -0.002                 | -0.006:0.003      | 0.43     |
| <b>Rate of change in RRMS vs. PPMS</b> | 0.001                  | -0.003:0.004      | 0.76     |
| <b>Network 11</b>                      |                        |                   |          |
| <b>Group comparison</b>                | <b>Cross-sectional</b> |                   |          |
|                                        | $\beta$                | <i>CI</i>         | <i>p</i> |
| <b>SPMS vs. RRMS</b>                   | -0.018                 | -0.031:-<br>0.006 | <0.005*  |
| <b>SPMS vs. PPMS</b>                   | -0.001                 | -0.015:0.012      | 0.87     |
| <b>RRMS vs. PPMS</b>                   | 0.017                  | 0.002:0.032       | <0.05    |
| <b>Group comparison</b>                | <b>Longitudinal</b>    |                   |          |
|                                        | $\beta$                | <i>CI</i>         | <i>p</i> |
| <b>Rate of change in SPMS vs. RRMS</b> | 0.001                  | -0.001:0.002      | 0.43     |

|                                        |                        |                   |          |
|----------------------------------------|------------------------|-------------------|----------|
| <b>Rate of change in SPMS vs. PPMS</b> | -0.002                 | -0.005:0.001      | 0.22     |
| <b>Rate of change in RRMS vs. PPMS</b> | -0.003                 | -0.006:0          | 0.07     |
| <b>Network 12</b>                      |                        |                   |          |
| <b>Group comparison</b>                | <b>Cross-sectional</b> |                   |          |
|                                        | $\beta$                | <i>CI</i>         | <i>p</i> |
| <b>SPMS vs. RRMS</b>                   | -0.031                 | -0.051:-<br>0.012 | <0.005*  |
| <b>SPMS vs. PPMS</b>                   | -0.005                 | -0.026:0.016      | 0.63     |
| <b>RRMS vs. PPMS</b>                   | 0.026                  | 0.003:0.049       | <0.05    |
| <b>Group comparison</b>                | <b>Longitudinal</b>    |                   |          |
|                                        | $\beta$                | <i>CI</i>         | <i>p</i> |
| <b>Rate of change in SPMS vs. RRMS</b> | 0.005                  | 0.002:0.007       | <0.0001* |
| <b>Rate of change in SPMS vs. PPMS</b> | 0.004                  | -0.001:0.009      | 0.11     |
| <b>Rate of change in RRMS vs. PPMS</b> | -0.001                 | -0.005:0.004      | 0.72     |
| <b>Network 13</b>                      |                        |                   |          |
| <b>Group comparison</b>                | <b>Cross-sectional</b> |                   |          |
|                                        | $\beta$                | <i>CI</i>         | <i>p</i> |
| <b>SPMS vs. RRMS</b>                   | -0.007                 | -0.027:0.013      | 0.47     |
| <b>SPMS vs. PPMS</b>                   | -0.042                 | -0.064:-<br>0.021 | <0.0001* |
| <b>RRMS vs. PPMS</b>                   | -0.035                 | -0.059:-<br>0.012 | <0.005*  |
| <b>Group comparison</b>                | <b>Longitudinal</b>    |                   |          |
|                                        | $\beta$                | <i>CI</i>         | <i>p</i> |
| <b>Rate of change in SPMS vs. RRMS</b> | 0.003                  | 0.001:0.005       | <0.005*  |
| <b>Rate of change in SPMS vs. PPMS</b> | 0.005                  | 0.001:0.009       | <0.05*   |
| <b>Rate of change in RRMS vs. PPMS</b> | 0.001                  | -0.002:0.005      | 0.43     |
| <b>Network 14</b>                      |                        |                   |          |
| <b>Group comparison</b>                | <b>Cross-sectional</b> |                   |          |
|                                        | $\beta$                | <i>CI</i>         | <i>p</i> |
| <b>SPMS vs. RRMS</b>                   | 0.002                  | -0.028:0.031      | 0.92     |
| <b>SPMS vs. PPMS</b>                   | 0.002                  | -0.029:0.034      | 0.90     |

|                                        |                        |                   |          |
|----------------------------------------|------------------------|-------------------|----------|
| <b>RRMS vs. PPMS</b>                   | 0.0001                 | -0.034:0.035      | 0.98     |
| <b>Group comparison</b>                | <b>Longitudinal</b>    |                   |          |
|                                        | $\beta$                | <i>CI</i>         | <i>p</i> |
| <b>Rate of change in SPMS vs. RRMS</b> | -0.005                 | -0.008:-<br>0.002 | <0.005*  |
| <b>Rate of change in SPMS vs. PPMS</b> | -0.006                 | -0.013:0          | <0.05    |
| <b>Rate of change in RRMS vs. PPMS</b> | -0.001                 | -0.007:0.004      | 0.65     |
| <b>Network 15</b>                      |                        |                   |          |
| <b>Group comparison</b>                | <b>Cross-sectional</b> |                   |          |
|                                        | $\beta$                | <i>CI</i>         | <i>p</i> |
| <b>SPMS vs. RRMS</b>                   | -0.02                  | -0.032:-<br>0.008 | <0.001*  |
| <b>SPMS vs. PPMS</b>                   | -0.01                  | -0.023:0.003      | 0.12     |
| <b>RRMS vs. PPMS</b>                   | 0.01                   | -0.004:0.024      | 0.16     |
| <b>Group comparison</b>                | <b>Longitudinal</b>    |                   |          |
|                                        | $\beta$                | <i>CI</i>         | <i>p</i> |
| <b>Rate of change in SPMS vs. RRMS</b> | 0.001                  | 0:0.003           | 0.07     |
| <b>Rate of change in SPMS vs. PPMS</b> | 0.005                  | 0.003:0.008       | <0.0001* |
| <b>Rate of change in RRMS vs. PPMS</b> | 0.004                  | 0.001:0.007       | <0.005*  |
| <b>Network 16</b>                      |                        |                   |          |
| <b>Group comparison</b>                | <b>Cross-sectional</b> |                   |          |
|                                        | $\beta$                | <i>CI</i>         | <i>p</i> |
| <b>SPMS vs. RRMS</b>                   | -0.006                 | -0.018:0.007      | 0.38     |
| <b>SPMS vs. PPMS</b>                   | -0.004                 | -0.017:0.01       | 0.59     |
| <b>RRMS vs. PPMS</b>                   | 0.002                  | -0.013:0.017      | 0.80     |
| <b>Group comparison</b>                | <b>Longitudinal</b>    |                   |          |
|                                        | $\beta$                | <i>CI</i>         | <i>p</i> |
| <b>Rate of change in SPMS vs. RRMS</b> | 0.0001                 | -0.001:0.002      | 0.79     |
| <b>Rate of change in SPMS vs. PPMS</b> | 0.001                  | -0.002:0.004      | 0.47     |
| <b>Rate of change in RRMS vs. PPMS</b> | 0.001                  | -0.002:0.004      | 0.52     |
| <b>Network 17</b>                      |                        |                   |          |

| <b>Group comparison</b>                | <b>Cross-sectional</b> |                   |          |
|----------------------------------------|------------------------|-------------------|----------|
|                                        | $\beta$                | <i>CI</i>         | <i>p</i> |
| <b>SPMS vs. RRMS</b>                   | -0.01                  | -0.031:0.012      | 0.37     |
| <b>SPMS vs. PPMS</b>                   | -0.055                 | -0.078:-<br>0.032 | <0.0001* |
| <b>RRMS vs. PPMS</b>                   | -0.046                 | -0.071:-<br>0.021 | <0.0005* |
| <b>Group comparison</b>                | <b>Longitudinal</b>    |                   |          |
|                                        | $\beta$                | <i>CI</i>         | <i>p</i> |
| <b>Rate of change in SPMS vs. RRMS</b> | 0.008                  | 0.005:0.011       | <0.0001* |
| <b>Rate of change in SPMS vs. PPMS</b> | 0.034                  | 0.028:0.04        | <0.0001* |
| <b>Rate of change in RRMS vs. PPMS</b> | 0.025                  | 0.02:0.031        | <0.0001* |
| <b>Network 18</b>                      |                        |                   |          |
| <b>Group comparison</b>                | <b>Cross-sectional</b> |                   |          |
|                                        | $\beta$                | <i>CI</i>         | <i>p</i> |
| <b>SPMS vs. RRMS</b>                   | -0.012                 | -0.025:0.001      | 0.06     |
| <b>SPMS vs. PPMS</b>                   | -0.001                 | -0.015:0.013      | 0.88     |
| <b>RRMS vs. PPMS</b>                   | 0.011                  | -0.004:0.026      | 0.15     |
| <b>Group comparison</b>                | <b>Longitudinal</b>    |                   |          |
|                                        | $\beta$                | <i>CI</i>         | <i>p</i> |
| <b>Rate of change in SPMS vs. RRMS</b> | -0.001                 | -0.002:0.001      | 0.25     |
| <b>Rate of change in SPMS vs. PPMS</b> | 0.0001                 | -0.003:0.003      | 0.98     |
| <b>Rate of change in RRMS vs. PPMS</b> | 0.001                  | -0.002:0.003      | 0.50     |
| <b>Network 19</b>                      |                        |                   |          |
| <b>Group comparison</b>                | <b>Cross-sectional</b> |                   |          |
|                                        | $\beta$                | <i>CI</i>         | <i>p</i> |
| <b>SPMS vs. RRMS</b>                   | -0.005                 | -0.018:0.008      | 0.48     |
| <b>SPMS vs. PPMS</b>                   | -0.002                 | -0.016:0.012      | 0.75     |
| <b>RRMS vs. PPMS</b>                   | 0.002                  | -0.013:0.018      | 0.76     |
| <b>Group comparison</b>                | <b>Longitudinal</b>    |                   |          |
|                                        | $\beta$                | <i>CI</i>         | <i>p</i> |
| <b>Rate of change in SPMS vs. RRMS</b> | -0.001                 | -0.003:0          | 0.053    |

|                                        |                        |                   |          |
|----------------------------------------|------------------------|-------------------|----------|
| <b>Rate of change in SPMS vs. PPMS</b> | -0.004                 | -0.007:-<br>0.002 | <0.005*  |
| <b>Rate of change in RRMS vs. PPMS</b> | -0.003                 | -0.005:-<br>0.001 | <0.05    |
| <b>Network 20</b>                      |                        |                   |          |
| <b>Group comparison</b>                | <b>Cross-sectional</b> |                   |          |
|                                        | $\beta$                | $CI$              | $p$      |
| <b>SPMS vs. RRMS</b>                   | -0.012                 | -0.028:0.005      | 0.16     |
| <b>SPMS vs. PPMS</b>                   | -0.018                 | -0.036:-<br>0.001 | <0.05    |
| <b>RRMS vs. PPMS</b>                   | -0.007                 | -0.026:0.012      | 0.48     |
| <b>Group comparison</b>                | <b>Longitudinal</b>    |                   |          |
|                                        | $\beta$                | $CI$              | $p$      |
| <b>Rate of change in SPMS vs. RRMS</b> | 0.001                  | -0.001:0.002      | 0.48     |
| <b>Rate of change in SPMS vs. PPMS</b> | 0.0001                 | -0.003:0.004      | 0.81     |
| <b>Rate of change in RRMS vs. PPMS</b> | 0.0001                 | -0.003:0.003      | 0.89     |
| <b>Whole brain grey matter volume</b>  |                        |                   |          |
| <b>Group comparison</b>                | <b>Cross-sectional</b> |                   |          |
|                                        | $\beta$                | $CI$              | $p$      |
| <b>SPMS vs. RRMS</b>                   | -0.012                 | -0.017:-<br>0.006 | <0.0001* |
| <b>SPMS vs. PPMS</b>                   | -0.003                 | -0.009:0.002      | 0.23     |
| <b>RRMS vs. PPMS</b>                   | 0.008                  | 0.002:0.014       | <0.01*   |
| <b>Group comparison</b>                | <b>Longitudinal</b>    |                   |          |
|                                        | $\beta$                | $CI$              | $p$      |
| <b>Rate of change in SPMS vs. RRMS</b> | 0.0001                 | -0.001:0.001      | 0.52     |
| <b>Rate of change in SPMS vs. PPMS</b> | -0.001                 | -<br>0.003:0.0001 | 0.13     |
| <b>Rate of change in RRMS vs. PPMS</b> | -0.002                 | -0.003:0          | <0.05    |

\*Statistically significant after False Discovery Rate

**Abbreviations:**  $\beta$  = Beta coefficients; SPMS = Secondary Progressive Multiple Sclerosis; PPMS = Primary Progressive Multiple Sclerosis; RRMS = Relapsing Remitting Multiple Sclerosis; SE = Standard Error

**Supplementary Table 6 Cross-sectional and longitudinal association of clinical disability (EDSS) with ICA GM networks and whole brain GM measures in training cohort.**

|                   |                       | <b>Entire cohort<br/>(<math>\beta</math>, 95%CI, <math>p</math>)</b> |
|-------------------|-----------------------|----------------------------------------------------------------------|
| <b>Network 2</b>  | <b>Baseline</b>       | -0.003, -0.029:0.022, P=0.80                                         |
|                   | <b>Rate of change</b> | -0.009, -0.016:-0.002, P<0.01*                                       |
| <b>Network 3</b>  | <b>Baseline</b>       | -0.03, -0.070:0.010, P=0.14                                          |
|                   | <b>Rate of change</b> | -0.011, -0.018:-0.004, P<0.005*                                      |
| <b>Network 11</b> | <b>Baseline</b>       | -0.017, -0.057:0.024, P=0.42                                         |
|                   | <b>Rate of change</b> | -0.004, -0.011:0.004, P=0.31                                         |
| <b>Network 12</b> | <b>Baseline</b>       | -0.037, -0.071:-0.003, P<0.05                                        |
|                   | <b>Rate of change</b> | -0.006, -0.014:0.001, P=0.09                                         |
| <b>Network 13</b> | <b>Baseline</b>       | -0.023, -0.058:0.012, P=0.19                                         |
|                   | <b>Rate of change</b> | -0.015, -0.022:-0.007, P<0.0001*                                     |
| <b>Network 14</b> | <b>Baseline</b>       | -0.026, -0.056:0.005, P=0.10                                         |
|                   | <b>Rate of change</b> | -0.009, -0.016:-0.001, P<0.05*                                       |
| <b>Network 18</b> | <b>Baseline</b>       | -0.016, -0.06:0.026, P=0.45                                          |
|                   | <b>Rate of change</b> | -0.002, -0.010:0.005, P=0.53                                         |
| <b>Network 19</b> | <b>Baseline</b>       | -0.045, -0.081:-0.009, P<0.05                                        |
|                   | <b>Rate of change</b> | -0.015, -0.022:-0.007, P<0.0001*                                     |
| <b>GM volume</b>  | <b>Baseline</b>       | -0.18, -0.25:-0.11, P<0.0001*                                        |
|                   | <b>Rate of change</b> | -0.009, -0.016:-0.001, P<0.05*                                       |

\* Statistically significant after False Discovery Rate correction



**Supplementary Table 7 Cross-sectional and longitudinal association of clinical disability (EDSS) with GM networks (obtained using Lasso) and whole brain GM measures in application cohort.**

|                   |                       | <b>Entire cohort<br/>(<math>\beta</math>, 95%CI, <math>p</math>)</b> |
|-------------------|-----------------------|----------------------------------------------------------------------|
| <b>Network 2</b>  | <b>Baseline</b>       | -0.03, -0.071:0.011, P=0.16                                          |
|                   | <b>Rate of change</b> | -0.024, -0.042:-0.006, P<0.01                                        |
| <b>Network 3</b>  | <b>Baseline</b>       | -0.089, -0.157:-0.021, P<0.01*                                       |
|                   | <b>Rate of change</b> | 0.008, -0.01:0.026, P=0.38                                           |
| <b>Network 11</b> | <b>Baseline</b>       | -0.008, -0.076:0.059, P=0.81                                         |
|                   | <b>Rate of change</b> | 0.005, -0.012:0.023, P=0.55                                          |
| <b>Network 12</b> | <b>Baseline</b>       | -0.012, -0.064:0.04, P=0.65                                          |
|                   | <b>Rate of change</b> | -0.019, -0.037:-0.001, P<0.05                                        |
| <b>Network 13</b> | <b>Baseline</b>       | -0.107, -0.157:-0.057, P<0.0001*                                     |
|                   | <b>Rate of change</b> | 0.008, -0.01:0.026, P=0.40                                           |
| <b>Network 14</b> | <b>Baseline</b>       | -0.014, -0.066:0.038, P=0.60                                         |
|                   | <b>Rate of change</b> | 0.004, -0.013:0.022, P=0.64                                          |
| <b>Network 18</b> | <b>Baseline</b>       | 0.005, -0.06:0.069, P=0.89                                           |
|                   | <b>Rate of change</b> | 0.011, -0.007:0.028, P=0.23                                          |
| <b>Network 19</b> | <b>Baseline</b>       | -0.095, -0.154:-0.036, P<0.005*                                      |
|                   | <b>Rate of change</b> | -0.001, -0.019:0.017, P=0.91                                         |
| <b>GM volume</b>  | <b>Baseline</b>       | -0.162, -0.288:-0.037, P<0.05*                                       |
|                   | <b>Rate of change</b> | 0.001, -0.017:0.019, P=0.93                                          |

\* Statistically significant after False Discovery Rate correction

**Supplementary Table 8 Cross-sectional and longitudinal association of clinical disability (EDSS) with GM networks (obtained using ICA) and whole brain GM measures in application cohort.**

|                   |                       | <b>Entire cohort<br/>(<math>\beta</math>, 95%CI, <math>p</math>)</b> |
|-------------------|-----------------------|----------------------------------------------------------------------|
| <b>Network 2</b>  | <b>Baseline</b>       | -0.011, -0.065:0.044, P=0.71                                         |
|                   | <b>Rate of change</b> | 0.001, -0.018:0.018, P=0.99                                          |
| <b>Network 3</b>  | <b>Baseline</b>       | -0.013, -0.079:0.053, P=0.69                                         |
|                   | <b>Rate of change</b> | 0.005, -0.013:0.023, P=0.60                                          |
| <b>Network 11</b> | <b>Baseline</b>       | -0.047, -0.094:0.001, P=0.054                                        |
|                   | <b>Rate of change</b> | 0.022, 0.004:0.04, P<0.05                                            |
| <b>Network 12</b> | <b>Baseline</b>       | -0.089, -0.151:-0.027, P<0.005*                                      |
|                   | <b>Rate of change</b> | 0.007, -0.01:0.025, P=0.41                                           |
| <b>Network 13</b> | <b>Baseline</b>       | 0.013, -0.057:0.083, P=0.71                                          |
|                   | <b>Rate of change</b> | -0.001, -0.019:0.017, P=0.93                                         |
| <b>Network 14</b> | <b>Baseline</b>       | 0.003, -0.048:0.053, P=0.92                                          |
|                   | <b>Rate of change</b> | -0.017, -0.035:0.001, P=0.06                                         |
| <b>Network 18</b> | <b>Baseline</b>       | 0.005, -0.061:0.071, P=0.88                                          |
|                   | <b>Rate of change</b> | 0.012, -0.005:0.03, P=0.18                                           |
| <b>Network 19</b> | <b>Baseline</b>       | -0.066, -0.123:-0.01, P<0.05*                                        |
|                   | <b>Rate of change</b> | 0.001, -0.016:0.019, P= 0.87                                         |
| <b>GM volume</b>  | <b>Baseline</b>       | -0.162, -0.288:-0.037, P<0.05*                                       |
|                   | <b>Rate of change</b> | 0.001, -0.017:0.019, P=0.93                                          |

\*Statistically significant after False Discovery Rate correction

**Supplementary Table 9 Assessing treatment effect using GM network measures obtained using Lasso.**

| <b>Network 2</b>             |          |         |               |          |
|------------------------------|----------|---------|---------------|----------|
|                              | % change | $\beta$ | 95% CI        | p        |
| <b>Annual rate of change</b> |          |         |               |          |
| Treatment group              | 1.03     | -0.010  | -0.015:-0.005 | <0.0001* |
| Placebo group                | 2.17     | -0.012  | -0.019:-0.004 | <0.005*  |

  

| <b>Network 3</b>             |          |         |               |          |
|------------------------------|----------|---------|---------------|----------|
|                              | % change | $\beta$ | 95% CI        | p        |
| <b>Annual rate of change</b> |          |         |               |          |
| Treatment group              | 0.46     | -0.005  | -0.005:-0.004 | <0.0001* |
| Placebo group                | 0.70     | -0.003  | -0.004:-0.001 | <0.0001* |

  

| <b>Network 11</b>            |          |         |               |          |
|------------------------------|----------|---------|---------------|----------|
|                              | % change | $\beta$ | 95% CI        | p        |
| <b>Annual rate of change</b> |          |         |               |          |
| Treatment group              | 0.66     | -0.007  | -0.008:-0.006 | <0.0001* |
| Placebo group                | 0.88     | -0.002  | -0.004:-0.001 | <0.001*  |

  

| <b>Network 12</b>            |          |         |               |          |
|------------------------------|----------|---------|---------------|----------|
|                              | % change | $\beta$ | 95% CI        | p        |
| <b>Annual rate of change</b> |          |         |               |          |
| Treatment group              | 1.23     | -0.012  | -0.014:-0.011 | <0.0001* |
| Placebo group                | 1.58     | -0.004  | -0.006:-0.001 | <0.005*  |

  

| <b>Network 13</b>            |          |         |               |          |
|------------------------------|----------|---------|---------------|----------|
|                              | % change | $\beta$ | 95% CI        | p        |
| <b>Annual rate of change</b> |          |         |               |          |
| Treatment group              | 0.29     | -0.003  | -0.004:-0.001 | <0.0001* |
| Placebo group                | 0.82     | -0.005  | -0.008:-0.003 | <0.0001* |

  

| <b>Network 18</b>            |          |         |               |          |
|------------------------------|----------|---------|---------------|----------|
|                              | % change | $\beta$ | 95% CI        | p        |
| <b>Annual rate of change</b> |          |         |               |          |
| Treatment group              | 0.52     | -0.005  | -0.006:-0.004 | <0.0001* |
| Placebo group                | 0.75     | -0.002  | -0.004:-0.001 | <0.005*  |

  

| <b>Network 19</b>            |          |         |        |   |
|------------------------------|----------|---------|--------|---|
|                              | % change | $\beta$ | 95% CI | p |
| <b>Annual rate of change</b> |          |         |        |   |
|                              |          |         |        |   |

|                 |      |        |               |          |
|-----------------|------|--------|---------------|----------|
| Treatment group | 0.60 | -0.006 | -0.007:-0.005 | <0.0001* |
| Placebo group   | 0.83 | -0.002 | -0.004:-0.001 | <0.05*   |

**Network 20**

|                              | % change | $\beta$ | 95% CI        | p        |
|------------------------------|----------|---------|---------------|----------|
| <b>Annual rate of change</b> |          |         |               |          |
| Treatment group              | 0.99     | -0.010  | -0.011:-0.009 | <0.0001* |
| Placebo group                | 1.29     | -0.003  | -0.005:-0.001 | <0.005*  |

**Grey matter**

|                              | % change | $\beta$ | 95% CI        | p        |
|------------------------------|----------|---------|---------------|----------|
| <b>Annual rate of change</b> |          |         |               |          |
| Treatment group              | 0.49     | -0.005  | -0.005:-0.005 | <0.0001* |
| Placebo group                | 0.63     | -0.001  | -0.020:-0.001 | <0.0001* |

**\*Statistically significant after False Discovery Rate (FDR) correction**

The table shows the results of mixed effect models where the interaction between time and treatment was the fixed (explanatory) effect and network loadings were the outcome measure. Eight networks and whole brain GM volume showed a treatment effect: participants in the treated arm had a lower rate of volume change (higher content of GM) over time than those in the placebo group.

**Abbreviations:**  $\beta$  = Beta Estimates

**Supplementary Table 10 Assessing treatment effect using GM network measures obtained using ICA fitted on the application cohort.**

| <b>Network 3</b>             |          |         |               |          |
|------------------------------|----------|---------|---------------|----------|
|                              | % change | $\beta$ | 95% CI        | p        |
| <b>Annual rate of change</b> |          |         |               |          |
| Treatment group              | 0.76     | -0.008  | -0.009:-0.007 | <0.0001* |
| Placebo group                | 0.95     | -0.002  | -0.003:-0.001 | <0.01*   |

  

| <b>Network 4</b>             |          |         |               |          |
|------------------------------|----------|---------|---------------|----------|
|                              | % change | $\beta$ | 95% CI        | p        |
| <b>Annual rate of change</b> |          |         |               |          |
| Treatment group              | 0.54     | -0.005  | -0.006:-0.005 | <0.0001* |
| Placebo group                | 0.82     | -0.003  | -0.004:-0.001 | <0.0001* |

  

| <b>Network 5</b>             |          |         |               |          |
|------------------------------|----------|---------|---------------|----------|
|                              | % change | $\beta$ | 95% CI        | p        |
| <b>Annual rate of change</b> |          |         |               |          |
| Treatment group              | 0.56     | -0.006  | -0.007:-0.005 | <0.0001* |
| Placebo group                | 1.05     | -0.005  | -0.007:-0.003 | <0.0001* |

  

| <b>Network 6</b>             |          |         |               |         |
|------------------------------|----------|---------|---------------|---------|
|                              | % change | $\beta$ | 95% CI        | p       |
| <b>Annual rate of change</b> |          |         |               |         |
| Treatment group              | 0.81     | -0.008  | -0.010:-0.007 | <0.001* |
| Placebo group                | 0.51     | 0.003   | 0.001:0.005   | <0.05*  |

  

| <b>Network 12</b>            |          |         |               |          |
|------------------------------|----------|---------|---------------|----------|
|                              | % change | $\beta$ | 95% CI        | p        |
| <b>Annual rate of change</b> |          |         |               |          |
| Treatment group              | 0.56     | -0.006  | -0.007:-0.005 | <0.0001* |
| Placebo group                | 0.76     | -0.002  | -0.003:-0.001 | <0.005*  |

  

| <b>Network 13</b>            |          |         |                |          |
|------------------------------|----------|---------|----------------|----------|
|                              | % change | $\beta$ | 95% CI         | p        |
| <b>Annual rate of change</b> |          |         |                |          |
| Treatment group              | 0.76     | -0.008  | -0.009:-0.007  | <0.0001* |
| Placebo group                | 0.91     | -0.002  | -0.003:-0.0002 | <0.05*   |

  

| <b>Network 14</b>            |          |         |               |          |
|------------------------------|----------|---------|---------------|----------|
|                              | % change | $\beta$ | 95% CI        | p        |
| <b>Annual rate of change</b> |          |         |               |          |
| Treatment group              | 1.47     | -0.015  | -0.017:-0.013 | <0.0001* |
| Placebo group                | 1.93     | -0.005  | -0.007:-0.002 | <0.001*  |

| <b>Network 17</b>            |          |         |               |         |
|------------------------------|----------|---------|---------------|---------|
|                              | % change | $\beta$ | 95% CI        | p       |
| <b>Annual rate of change</b> |          |         |               |         |
| Treatment group              | 0.55     | -0.006  | -0.009:-0.002 | <0.005* |
| Placebo group                | 1.45     | -0.009  | -0.015:-0.004 | <0.001* |

  

| <b>Network 18</b>            |          |         |               |          |
|------------------------------|----------|---------|---------------|----------|
|                              | % change | $\beta$ | 95% CI        | p        |
| <b>Annual rate of change</b> |          |         |               |          |
| Treatment group              | 0.48     | -0.005  | -0.006:-0.004 | <0.0001* |
| Placebo group                | 0.72     | -0.002  | -0.004:-0.001 | <0.0005* |

  

| <b>Network 20</b>            |          |         |               |          |
|------------------------------|----------|---------|---------------|----------|
|                              | % change | $\beta$ | 95% CI        | p        |
| <b>Annual rate of change</b> |          |         |               |          |
| Treatment group              | 0.91     | -0.009  | -0.011:-0.008 | <0.0001* |
| Placebo group                | 1.26     | -0.004  | -0.006:-0.001 | <0.001*  |

  

| <b>Grey matter</b>           |          |         |               |          |
|------------------------------|----------|---------|---------------|----------|
|                              | % change | $\beta$ | 95% CI        | p        |
| <b>Annual rate of change</b> |          |         |               |          |
| Treatment group              | 0.49     | -0.005  | -0.005:-0.005 | <0.0001* |
| Placebo group                | 0.63     | -0.001  | -0.002:-0.001 | <0.0001* |

**\*Statistically significant after False Discovery Rate (FDR) correction**

The table shows the results of mixed effect models where the interaction between time and treatment was the fixed (explanatory) effect and network loadings were the outcome measure. Eight networks and whole brain GM volume showed a treatment effect: participants in the treated arm had a lower rate of volume change (higher content of GM) over time than those in the placebo group.

**Abbreviations:**  $\beta$  = Beta Estimates

**Supplementary Table 11 Sample size estimation for each arm for treatment effect detection with a significance level of 0.05 and a power of 0.80**

|                              | <b>Sample size</b> |
|------------------------------|--------------------|
| <b>Network 2</b>             | 526                |
| <b>Network 3</b>             | 550                |
| <b>Network 11</b>            | 477                |
| <b>Network 12</b>            | 565                |
| <b>Network 13</b>            | 227                |
| <b>Network 18</b>            | 756                |
| <b>Network 19</b>            | 763                |
| <b>Network 20</b>            | 1684               |
| <b>Whole brain GM volume</b> | 753                |

**Supplementary Figure 1. Rate of grey matter volume loss across multiple sclerosis phenotypes over time.**

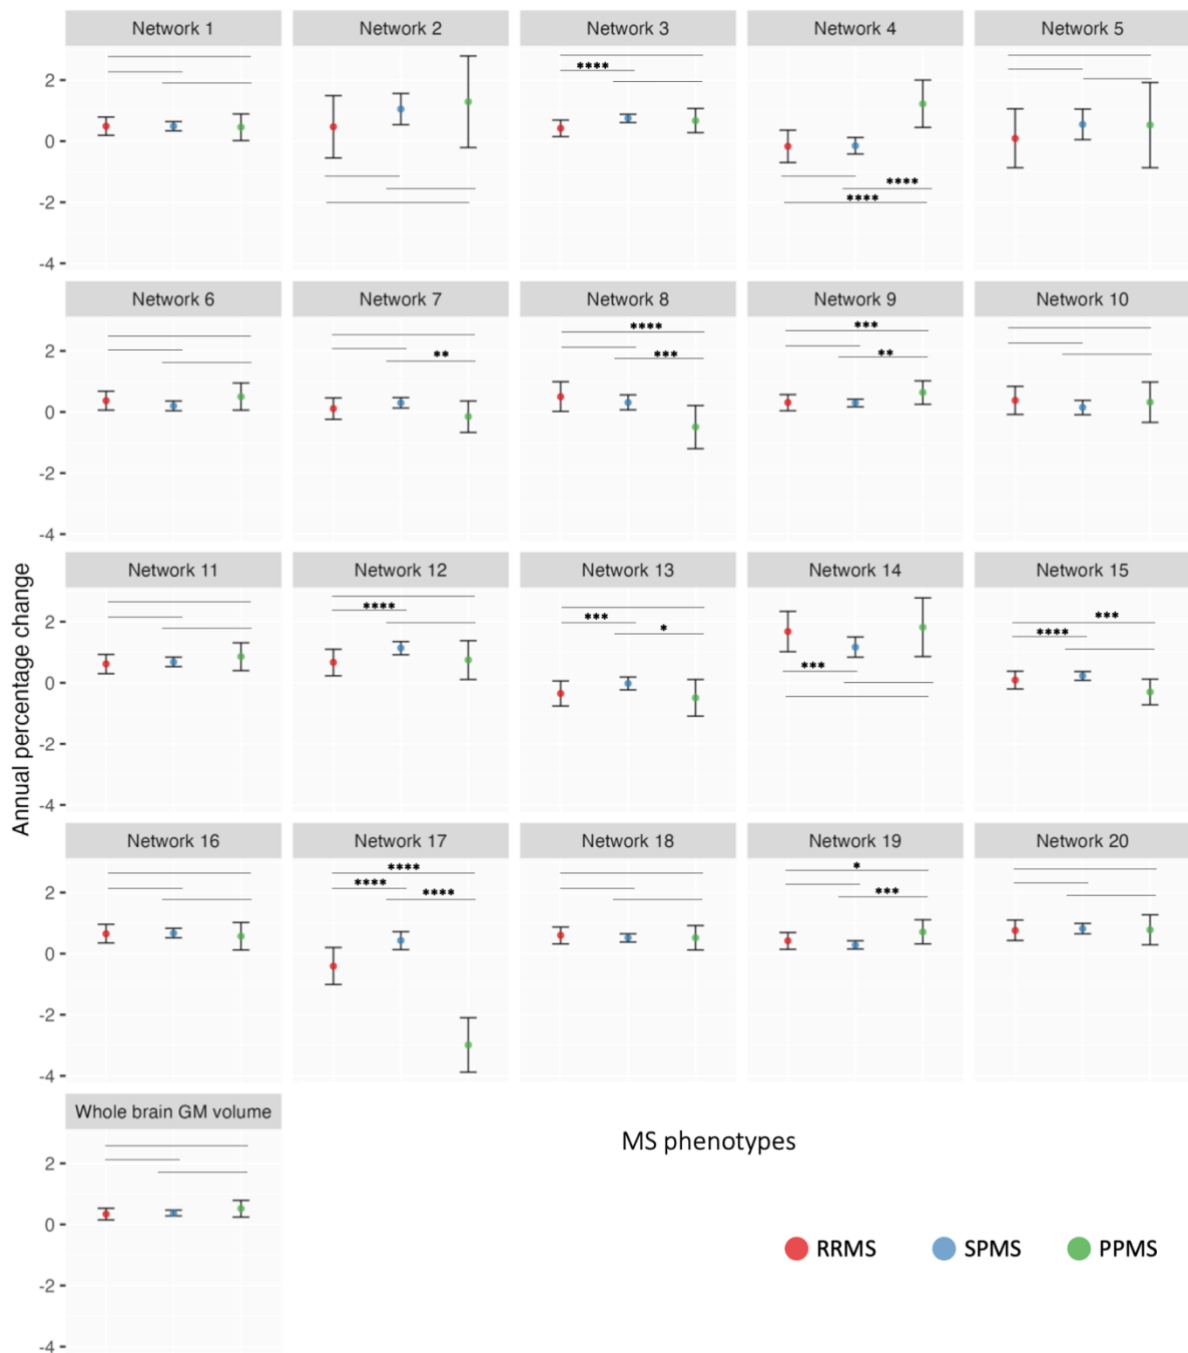

**Caption.** The rate of change in grey matter networks differed among MS phenotypes over time. Network 3 and 12 differed between participants with SPMS and RRMS, showing a greater



annual percentage change in network loading (more GM atrophy) in people with SPMS than in RRMS. Networks 4, 9, and 19 over time differed between people with PPMS and those with RRMS and SPMS, with a faster volume loss rate in people with PPMS. Network 7 differed between participants with SPMS and PPMS, with faster volume loss in people with SPMS. Network 8 over time differed between people with PPMS and those with RRMS and SPMS, with a higher rate of volume change in RRMS and SPMS. Networks 13 and 17 differed between participants with SPMS and those with RRMS and PPMS, with a faster volume loss rate in people with SPMS. Network 14 showed a faster rate of volume change in people with RRMS than in SPMS, and network 17 a faster volume loss in participants with RRMS than in those with PPMS. Whole brain GM volume did not differ among MS phenotypes after correcting for multiple comparisons.

\*\*\*\*  $P < 0.0001$ ; \*\*\*  $P < 0.005$ ; \*\*  $P < 0.01$ ; \* $P < 0.05$

**Legend: GM, grey matter; MS, multiple sclerosis; RRMS, relapsing remitting multiple sclerosis; SPMS, secondary progressive multiple sclerosis; PPMS, primary progressive multiple sclerosis**
